# Supplementary material
Source: Springer Nature journal article supplement (https://www.springermedizin.de/resource/supplementary/13058_2005_1311_MOESM4_ESM.pdf/9698828)

**B**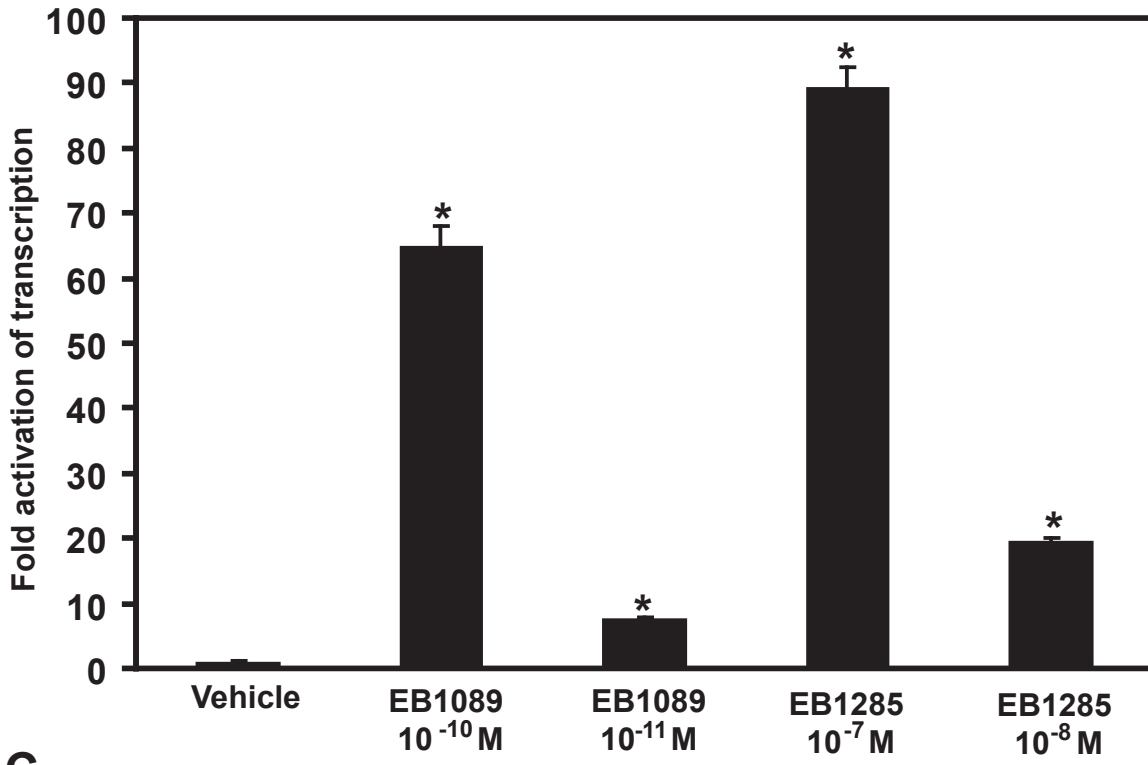**C**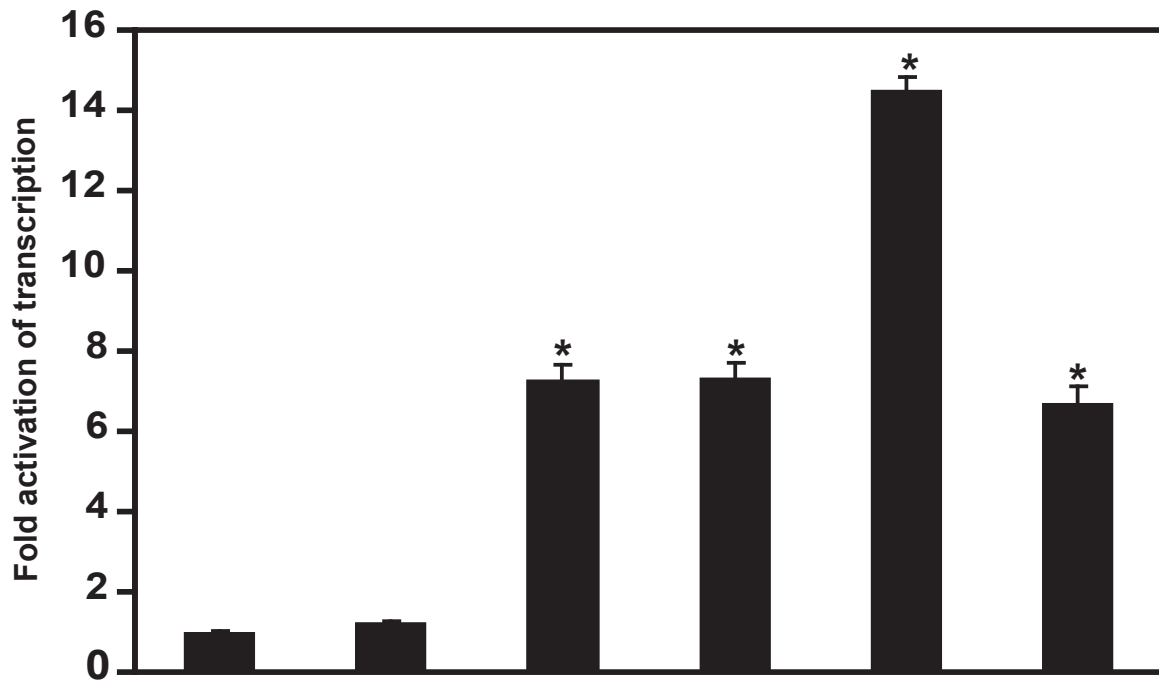

Vehicle +  
Ketoconazole (5  $\mu$ M) +  
EB1089 ( $10^{-11}$  M) +  
EB1285 ( $10^{-8}$  M) +

Supplement: MOESM4 [file 9698828]
